# Supplementary material
Source: Springer Nature journal article supplement (https://www.springermedizin.de/resource/supplementary/12967_2013_1737_MOESM3_ESM.pdf/9575196)
Supplement: MOESM3 [file 9575196]

### A

| ID          | E2.1 | E2.2 | E6.1 | E6.2 | E6.3 | E6.4 | E7.1 | E7.2 | MRM |
|-------------|------|------|------|------|------|------|------|------|-----|
| CIN3 Mother | 1A   | 8    |      |      |      |      |      |      | 224 |
|             | 4A   | 12   |      |      |      |      |      |      | 249 |
|             | 5A   | 24   |      |      |      |      |      |      | 126 |
|             | 6A   | 23   |      |      |      |      |      |      | 158 |
|             | 7A   | 27   | 18   |      |      | 15   |      |      | 195 |
| CIN2 Mother | 3A   | 14   |      |      |      |      |      |      | 271 |
|             | 8A   | 16   | 17   |      |      |      |      |      | 87  |
|             | 9A   | 5    | 7    |      |      |      |      |      | 155 |
| CIN1 Mother | 2A   | 50   | 17   |      | 9    |      | 25   |      | 170 |
|             | 10A  |      |      |      |      |      |      |      | 30  |
| CIN3 Child  | 1B   | 14   | 18   |      | 23   | 8    | 14   |      | 103 |
|             | 4B   | 27   | 7    |      |      |      |      |      | 92  |
|             | 5B   | 10   | 9    |      |      | 4    | 3    |      | 56  |
|             | 6B   | 12   | 9    |      |      |      | 17   | 7    | 90  |
|             | 7B   | 16   | 20   |      |      |      |      | 9    | 121 |
| CIN2 Child  | 3B   | 20   | 5    |      |      |      |      |      | 164 |
|             | 8B   | 12   | 11   |      | 3    |      | 3    | 3    | 39  |
|             | 9B   | 6    | 10   |      |      |      |      |      | 134 |
| CIN1 Child  | 2B   | 24   | 6    |      |      |      |      |      | 126 |
|             | 10B  | 14   |      |      |      | 6    |      |      | 12  |

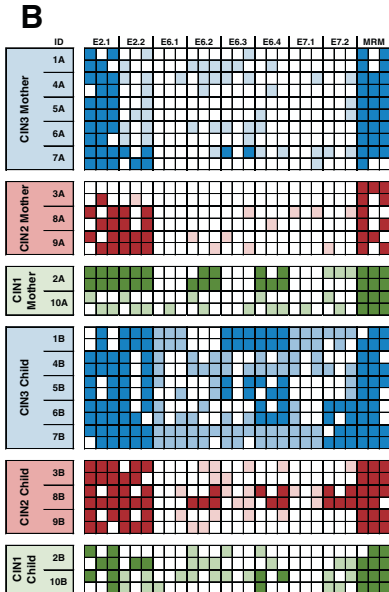

|               |               |       |
|---------------|---------------|-------|
| IFN- $\gamma$ | TNF- $\alpha$ | IL-2  |
| IL-5          | IL-10         | IL-17 |

### C

| ID          | E2.1 | E2.2 | E6.1 | E6.2 | E6.3 | E6.4 | E7.1 | E7.2  | MRM   |
|-------------|------|------|------|------|------|------|------|-------|-------|
| CIN3 Mother | 1A   | ND    | ND    |
|             |      |      |      |      |      |      |      |       | 16.92 |
|             | 4A   | ND    | ND    |
|             |      |      |      |      |      |      |      |       | 24.09 |
|             | 5A   | 0.63 | 0.68 | ND   | 0.06 | ND   | ND   | 0.42  | ND    |
|             | ND   | ND   |      | ND   | ND   |      | ND   | ND    |       |
|             |      |      |      |      |      |      |      | 3.42  |       |
|             |      |      |      |      |      |      |      | 30.71 |       |
| 6A          | ND   | ND   | ND   | ND   | ND   | ND   | 0.20 | ND    | ND    |
|             |      |      |      |      |      |      |      | ND    | ND    |
|             |      |      |      |      |      |      |      |       | 9.04  |
| 7A          | ND    | ND    |
|             |      |      |      |      |      |      |      |       | ND    |
|             |      |      |      |      |      |      |      |       | 0.87  |
| CIN2 Mother | 3A   | ND   |      |      |      |      |      |       | 0.07  |
|             |      | 0.33 |      |      |      |      |      |       | ND    |
|             | 8A   | ND    | ND    |
| 9A          | ND    | ND    |
|             |      |      |      |      |      |      |      |       | ND    |
|             |      |      |      |      |      |      |      |       | 14.69 |
| CIN1 Mother | 2A   | ND   | 0.34 | ND   | ND   | ND   | ND   | ND    | 2.62  |
|             |      |      | ND   |      |      | 0.08 |      |       | 0.50  |
|             |      |      |      |      |      |      |      |       | 1.28  |
| 10A         | ND    | ND    |
|             |      |      |      |      |      |      |      |       | 0.32  |
| CIN3 Child  | 1B   | ND    | ND    |
|             |      |      |      |      |      |      |      |       | ND    |
|             |      |      |      |      |      |      |      |       | 14.26 |
|             | 4B   | ND    | ND    |
|             |      |      |      |      |      |      |      |       | ND    |
|             |      |      |      |      |      |      |      | 10.32 |       |
| 5B          | ND    | ND    |
|             |      |      |      |      |      |      |      |       | 1.28  |
|             |      |      |      |      |      |      |      |       | 3.44  |
| 6B          | ND   |      |      |      |      |      |      |       | ND    |
|             |      | 1.31 | 0.02 | 1.34 | 1.33 | 1.39 | 1.23 | 2.20  |       |
|             |      | ND    | ND    |
| 7B          | ND    | ND    |
| CIN2 Child  | 3B   | ND    | 0.86  |
|             |      |      |      |      | 0.39 |      |      |       | 2.48  |
|             | 8B   | ND    | ND    |
| 9B          | 0.44 | 0.66 | ND   | ND   | ND   | ND   | ND   | ND    | ND    |
|             | ND   | ND   |      |      |      |      |      |       | 3.47  |
| CIN1 Child  | 2B   | ND    | ND    |
|             |      |      |      |      |      |      |      |       | ND    |
|             |      |      |      |      |      |      |      |       | 24.82 |
| 10B         | ND   | 0.18 | ND   | ND   | ND   | ND   | ND   | ND    | 0.30  |
|             |      | ND   |      |      |      |      |      |       | ND    |

|          |
|----------|
| Foxp3+ % |
| Foxp3- % |
